# Supplementary material for: Selection and application of aptamers with high-affinity and high-specificity against dinophysistoxin-1
Source: Royal Society of Chemistry journal article supplement (doi:10.1039/c9ra10600f), 2020-01-01
Supplement: c9ra10600f1.pdf [file c9ra10600f1.pdf]

## **Selection and Application of Aptamers with High-affinity and High-specificity against Dinophysistoxin-1**

Zhen Li<sup>a,\*</sup>, Bo Hu<sup>a,\*</sup>, Rong Zhou<sup>a,\*</sup>, Xiaojuan Zhang<sup>a,c,\*</sup>, Ruizhe Wang<sup>b</sup>, Yun Gao<sup>a</sup>, Mingjuan Sun<sup>a</sup>, Bing-hua Jiao<sup>a,#</sup>, Lianghua Wang<sup>a,#</sup>

a. Department of Biochemistry and Molecular Biology, College of Basic Medical Sciences, Navy Medical University, Shanghai 200433, P.R. China.

b. Spine Center, Department of Orthopedics, Changzheng Hospital Affiliated to Second Military Medical University, 415th Feng Yang Road, Shanghai, 200003, P.R. China

c. College of Medicine, Shaoxing University, 900th Chengnan Avenue, Shaoxing, Zhejiang Province, 312000, P.R. China

# Corresponding authors

\* These authors contributed equally to this work

## Materials and methods

**Supplementary Table 1. Summary of sequences involved in the text**

|                         |                                                                           |
|-------------------------|---------------------------------------------------------------------------|
| Library pool*           | GAGGCAGCACTTCACACGAT-N <sub>27</sub> -CTGCGTAATGACTGTAGTGATG              |
| forward primer          | GAGGCAGCACTTCACACGAT                                                      |
| reverse primer          | CATCACTACAGTCATTACGCAG                                                    |
| modified reverse primer | poly(dA <sub>20</sub> )-Spacer18-CATCACTACAGTCATTACGCAG                   |
| N11                     | GAGGCAGCACTTCACACGATCGGACCCAAACTTTACCTTACCCCCATCTGCGTAATGACTGTA<br>GTGATG |
| N26                     | GAGGCAGCACTTCACACGATGCCTCCTACCTTGCTGCCTTAGCCGGTCTGCGTAATGACTGTA<br>GTGATG |
| N16                     | GAGGCAGCACTTCACACGATATTTGGGGATCAGCCAGGTCAGTGCCACTGCGTAATGACTGT<br>AGTGATG |
| N50                     | GAGGCAGCACTTCACACGATCGTCCCTGCCCTGCCTCCTTTCTATGCTGCGTAATGACTGTA<br>GTGATG  |
| N29                     | GAGGCAGCACTTCACACGATCGCTGAAGTCAACCTCCCCTACCTGTGCTGCGTAATGACTGTA<br>GTGATG |
| N59                     | GAGGCAGCACTTCACACGATCCACCAGGCCAAACACGACCCCAAACACTGCGTAATGACTGT<br>AGTGATG |
| N63                     | GAGGCAGCACTTCACACGATCCCTCCTCCTTTATATCCGGTCCGATCTGCGTAATGACTGTA<br>GTGATG  |
| N72                     | GAGGCAGCACTTCACACGATCCCCGTTCTTGTCCTTCTCTATATCTGCGTAATGACTGTA<br>GTGATG    |
| N41                     | GAGGCAGCACTTCACACGATCCCCCCCACACTCTTCCAACCCCCTCTCTGCGTAATGACTGTA<br>GTGATG |
| N8                      | GAGGCAGCACTTCACACGATCACGGCAGGAGACCATCACCATATCGCTGCGTAATGACTGT<br>AGTGATG  |
| N59a                    | CCACCAGGCCAAACACGACCCCAAACA                                               |
| N59b                    | GAGGCAGCACTTCACACGATCCACCAGGCCAAACACGACCCCAAACA                           |
| N59c                    | CCAGGCCAAACACGACCCC                                                       |
| N59a1                   | CCACCAGGCCAAACA                                                           |
| N59a2                   | CCACCAGGCCAAACACGACCCC                                                    |
| N59a3                   | CCACCAGGCCAAACACGACCC                                                     |
| N59a4                   | CCACCAGGCCAAACACGACC                                                      |
| N59a5                   | CCACCAGGCCAAACACGA                                                        |
| N59a6                   | CCACCAGGCCAACC                                                            |
| N59a7                   | CCAGGCCAAACACGACC                                                         |

\*N: Random base.

**Supplementary Table 2. Summary of selection protocol for MB-SELEX**

| Selection round | Amount of ssDNA pool (pmol) | Incubation time for MB-Counter SELEX (min) | Incubation time for MB-Positive SELEX (min) | Wash times after incubation |
|-----------------|-----------------------------|--------------------------------------------|---------------------------------------------|-----------------------------|
| 1               | 3000                        | 0                                          | 120                                         | 3                           |
| 2-5             | 200                         | 0                                          | 120                                         | 3                           |
| 6-8             | 120                         | 60                                         | 90                                          | 3                           |
| 9-10            | 120                         | 60                                         | 90                                          | 4                           |
| 11-12           | 120                         | 90                                         | 60                                          | 5                           |

## Supporting Results

Supplementary Figure 1. The relationship between the absorbance and concentration of DTX-1.

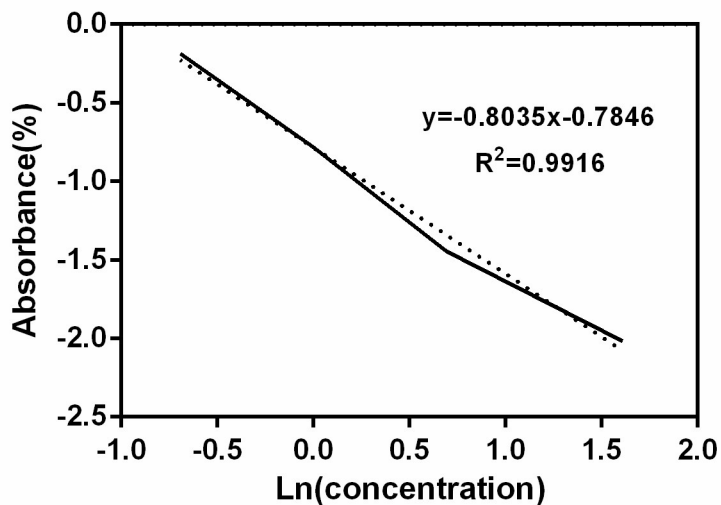

Fig. S1. The relationship between the absorbance and concentration of DTX-1.

The efficiency of coupling between beads and DTX-1 was measured by using an ELISA kit. We got the standard curve according to the standards and related instructions provided in the kit. The linear regression of the curve is:  $y = -0.8035x - 0.7846$ , while  $R^2 = 0.9916$ . Then confirmation the immobilization efficiency by measuring the free DTX-1 in the solution before and after incubation. The results showed that before incubation, the free DTX-1 in the solution was 14  $\mu\text{g}$  while after incubation, the free DTX-1 in the solution was 2.5  $\mu\text{g}$  ( $n=2$ ), that means, 11.5  $\mu\text{g}$  DTX-1 was immobilized onto the magnetic beads (600  $\mu\text{L}$ ).

**Supplementary Figure 2. Gel electrophoresis results of ssDNA preparation.**

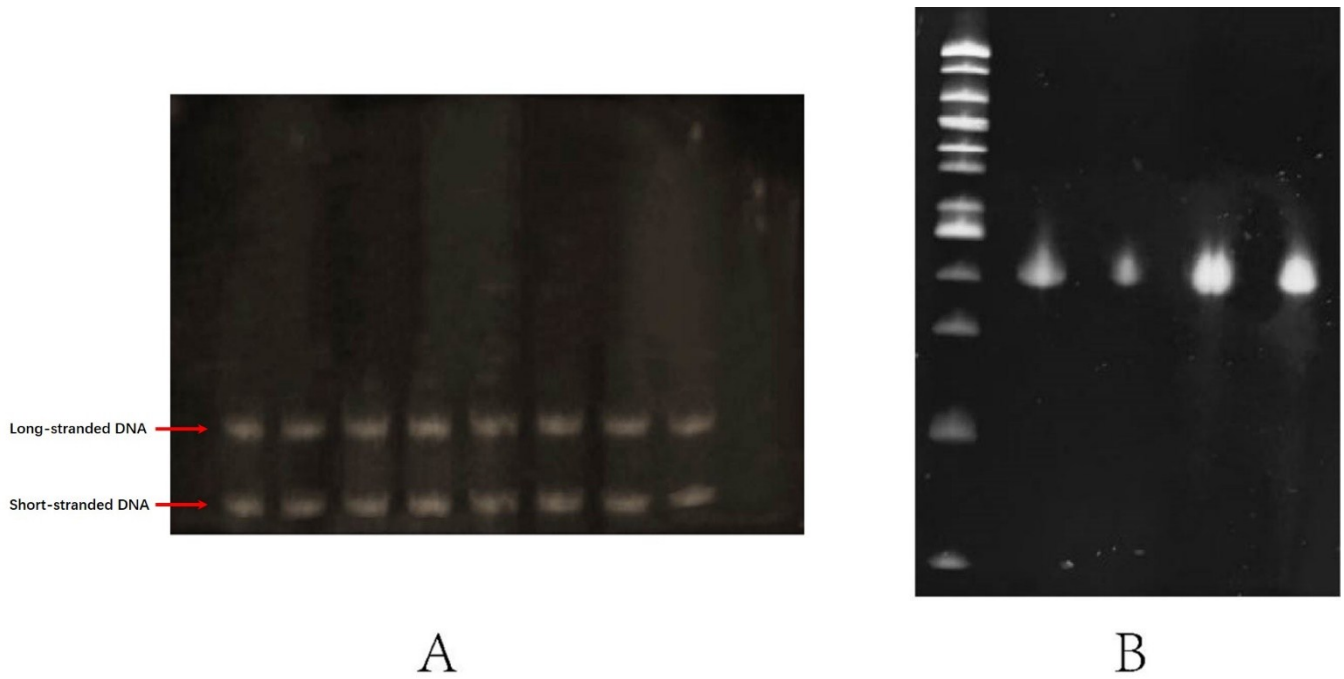

Fig. S2. (A) Gel electrophoresis results of the 12<sup>th</sup> round of selection. The dsDNA obtained by PCR can be clearly separated by gel electrophoresis due to the difference lengths of forward primer and modified reverse primer. We recovered the following ssDNA for the library preparation. (B) Gel electrophoresis results of the ssDNA preparation from the 3<sup>th</sup>, 6<sup>th</sup>, 9<sup>th</sup>, 12<sup>th</sup> round.

**Supplementary Figure 3. Multiple sequence alignment of the selected sequences**

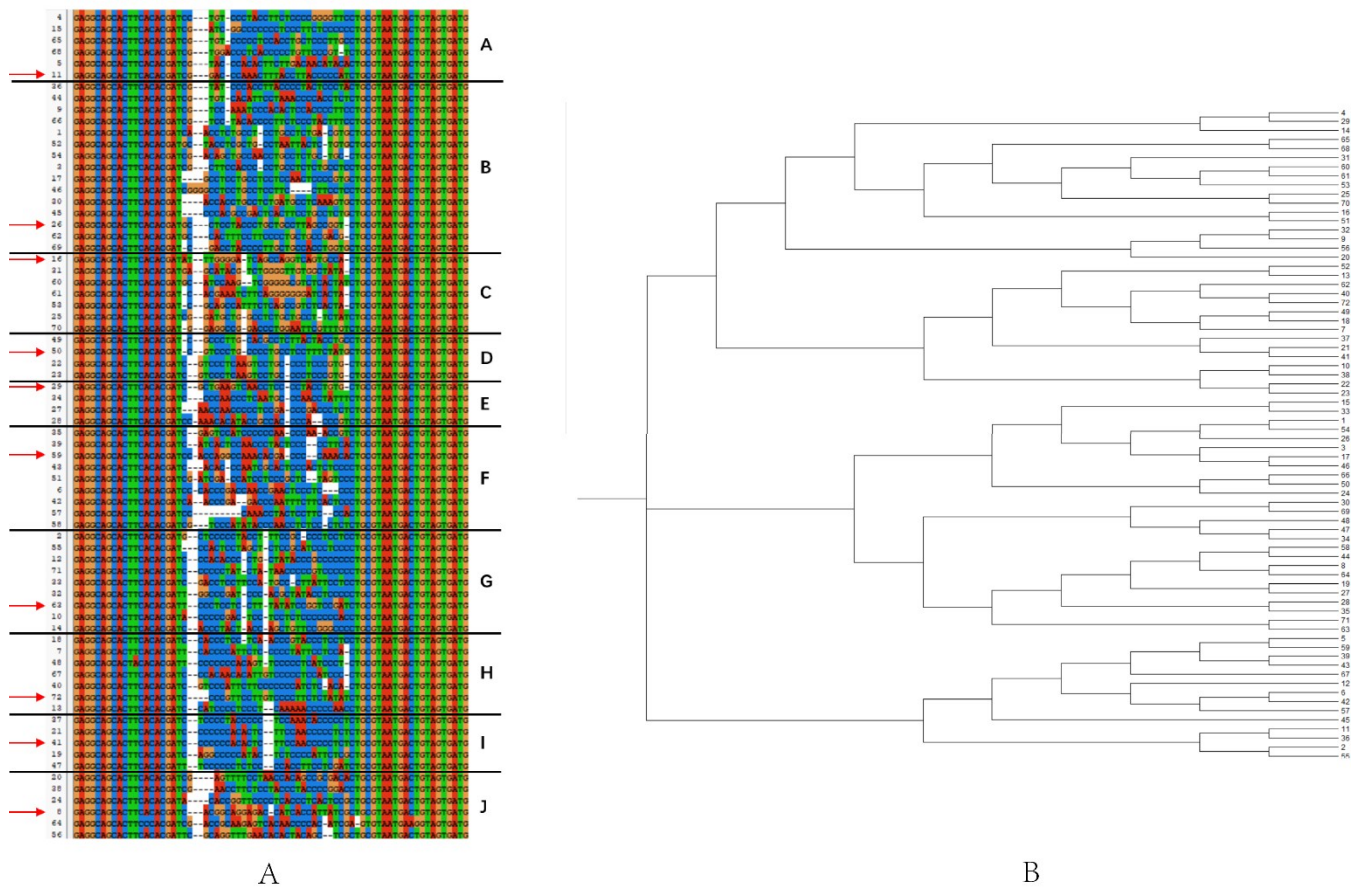

Fig. S3. (A) Multiple sequence alignment of cloned sequencing results by Clustal X software. These sequences were grouped based on conservation into 10 families (A-J), and a representative sequence was chosen from each group for further analysis (N11, 26, 16, 50, 29, 59, 63, 72, 41 and 8). (B) The guide tree of cloned sequencing results.

**Supplementary Table 3. Affinity constant ( $K_d$ ) between DTX-1 and truncated aptamers**

| Name  | Sequence                                                                  | $K_d$ (nM) * |
|-------|---------------------------------------------------------------------------|--------------|
| N59   | GAGGCAGCACTTCACACGATCCACCAGGCCAAACACGACCCCAAACA<br>CTGCGTAATGACTGTAGTGATG | 170          |
| N59a  | CCACCAGGCCAAACACGACCCCAAACA                                               | 64           |
| N59b  | GAGGCAGCACTTCACACGATCCACCAGGCCAAACACGACCCCAAACA                           | 370          |
| N59c  | CCAGGCCAAACACGACCCC                                                       | 340          |
| N59a1 | CCACCAGGCCAAACA                                                           | NB           |
| N59a2 | CCACCAGGCCAAACACGACCCC                                                    | 278          |
| N59a3 | CCACCAGGCCAAACACGACCC                                                     | 178          |
| N59a4 | CCACCAGGCCAAACACGACC                                                      | 142          |
| N59a5 | CCACCAGGCCAAACACGA                                                        | NB           |
| N59a6 | CCACCAGGCCAACC                                                            | NB           |
| N59a7 | CCAGGCCAAACACGACC                                                         | NB           |

\*NB: No Binding.

Table S3. Sequences and affinity constants between DTX-1 and optimized aptamers.

Supplementary Figure 4. Secondary structure of truncated sequences for aptamers.

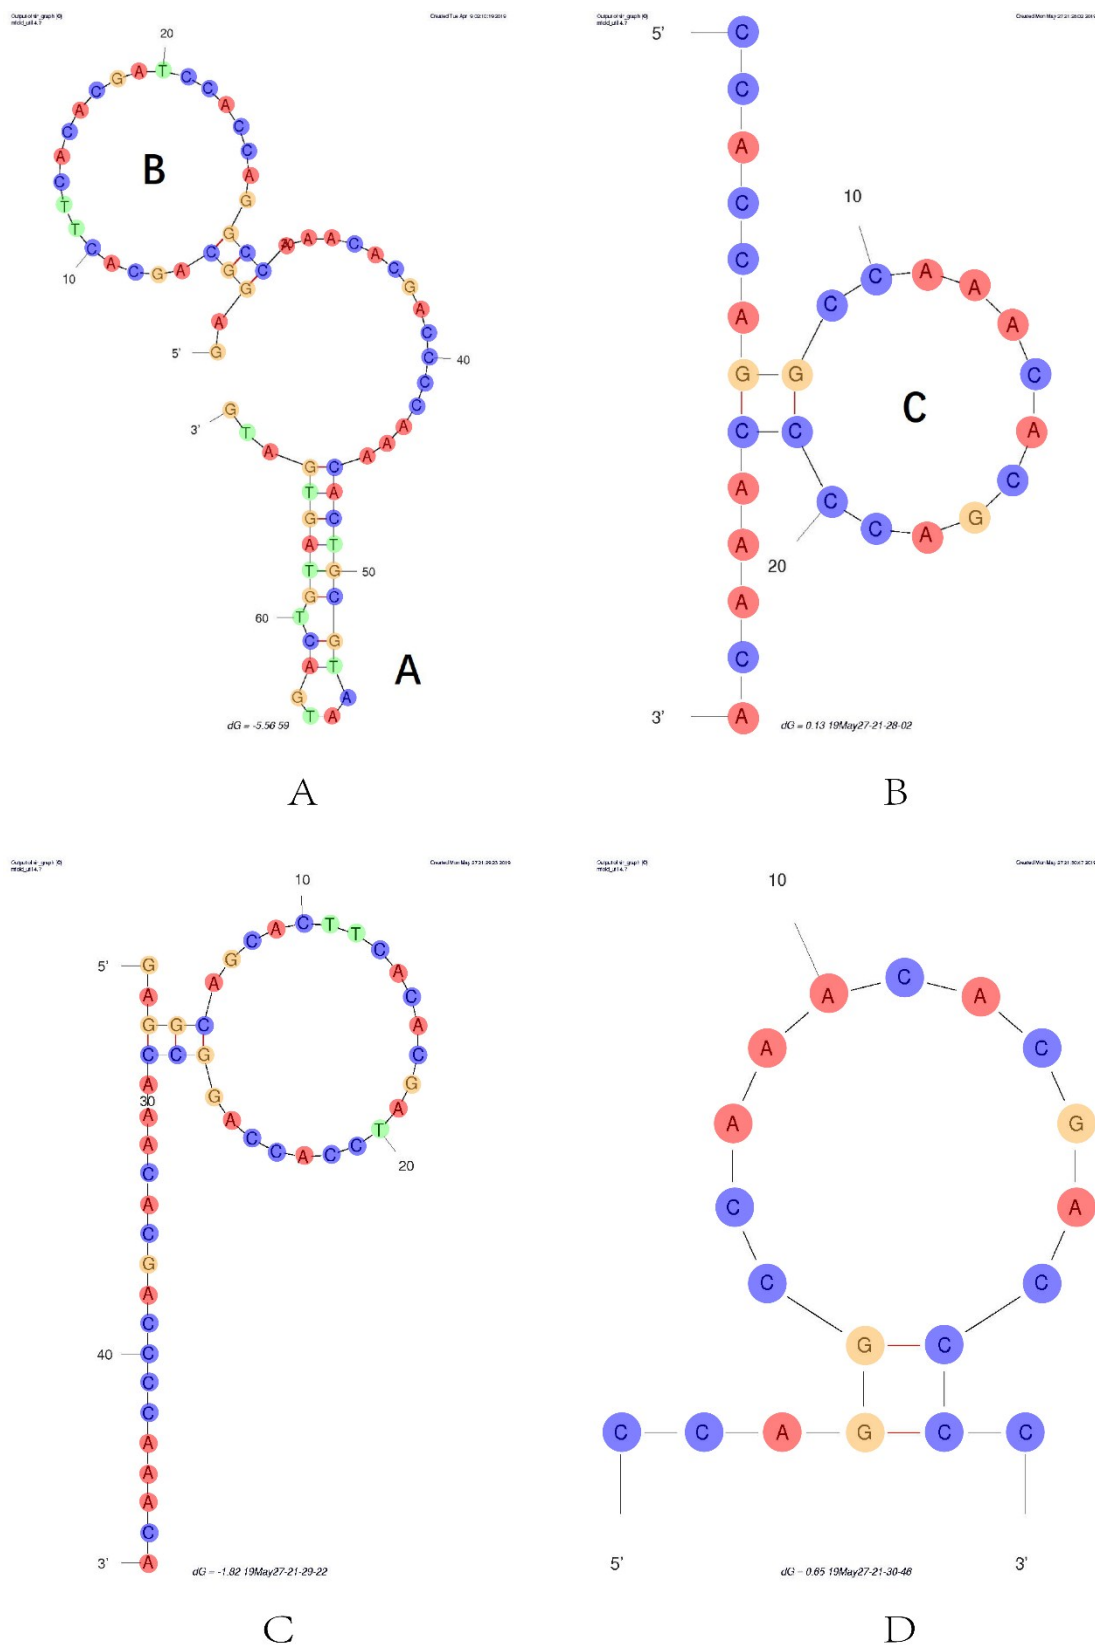

Supplementary Figure 4. Secondary structure of truncated sequences for aptamers. (A) N59. (B) N59a. (C) N59b. (D) N59c.
